# Supplementary figures and images for: Mesoporous silica nanoparticles inflame tumors to overcome anti-PD-1 resistance through TLR4-NFκB axis
Source: PubMed Central journal article supplement — J Immunother Cancer. 2021 Jun 10;9(6):e002508. doi: 10.1136/jitc-2021-002508 (PMC8202116; doi:10.1136/jitc-2021-002508), 2021-06-10

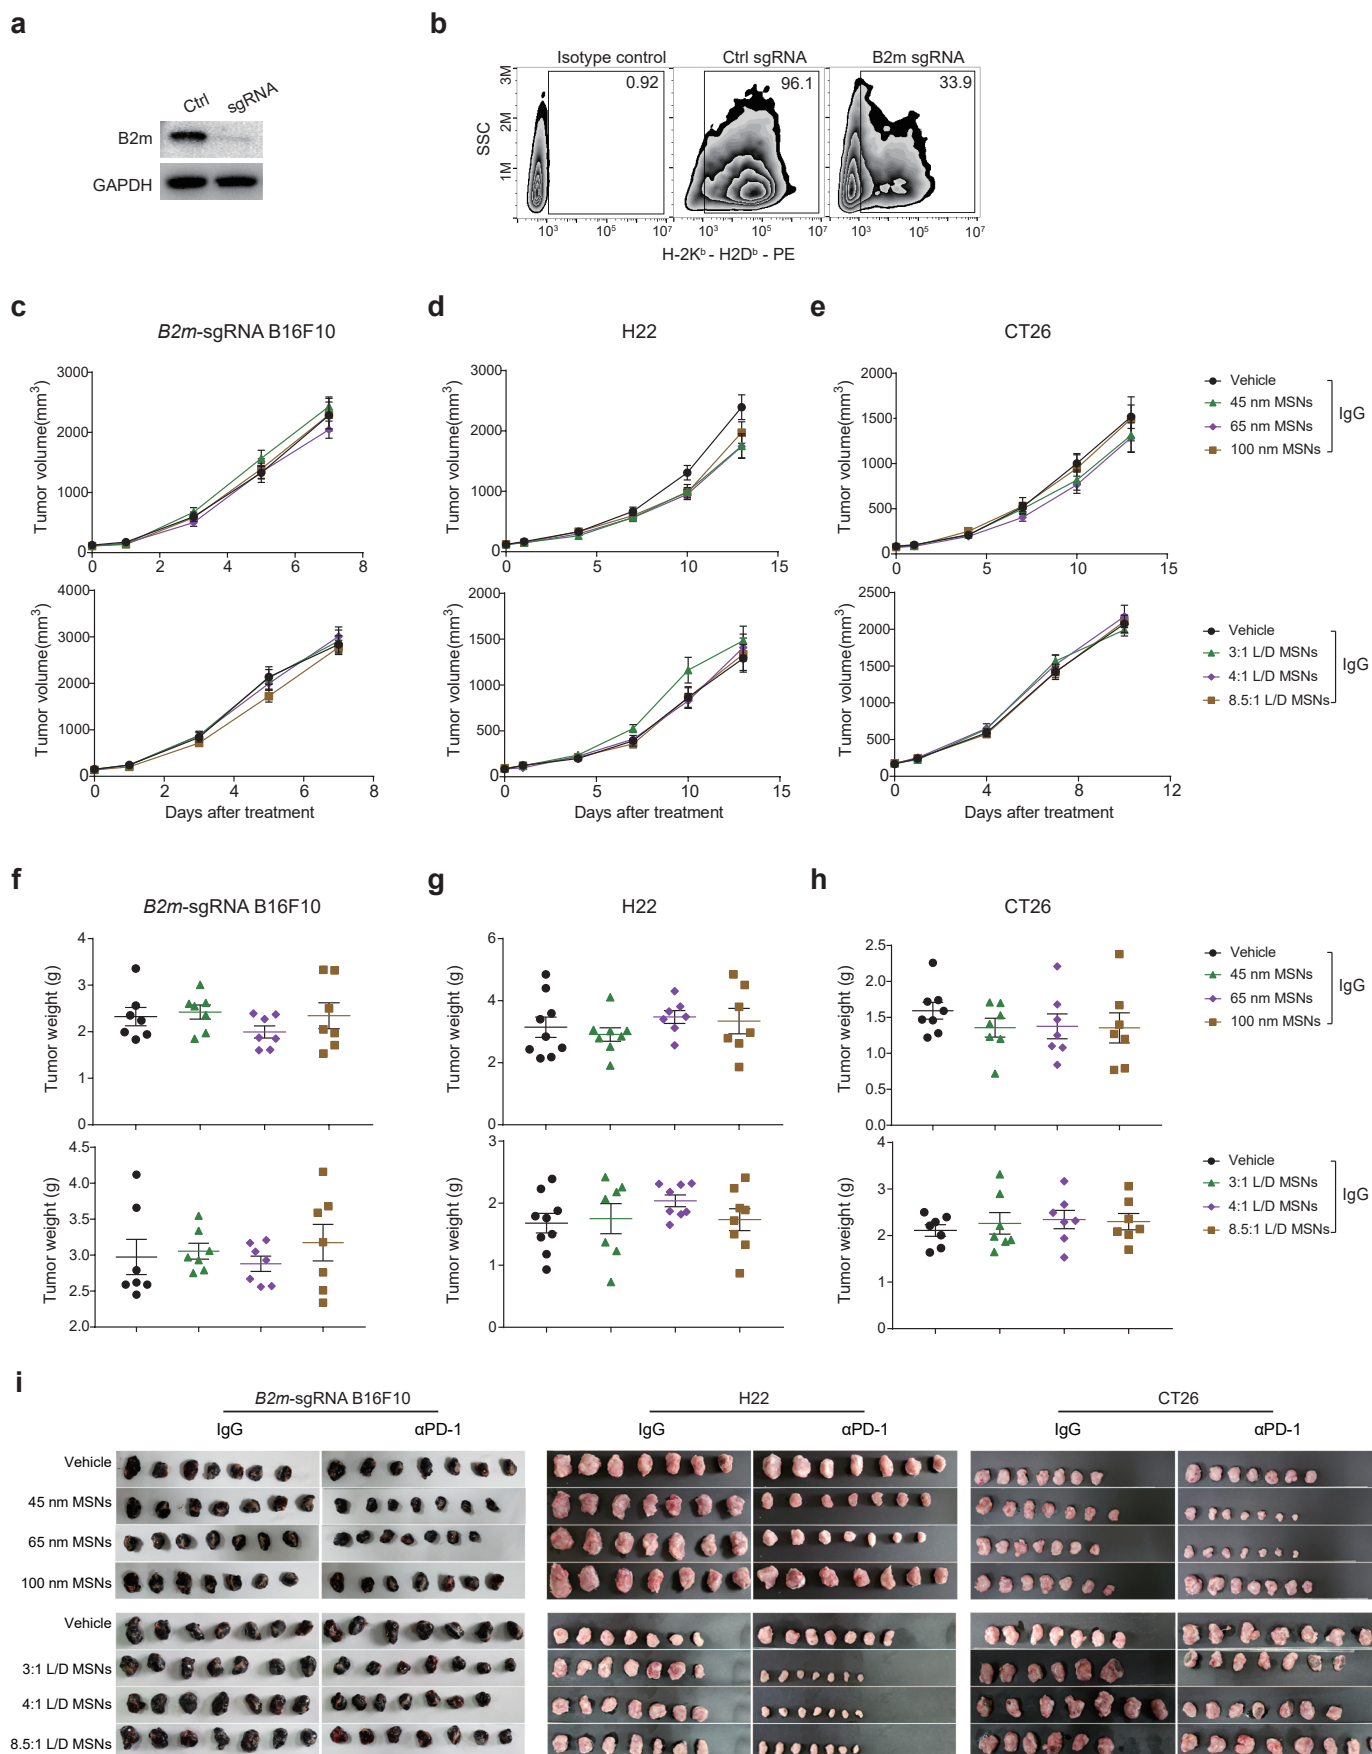

Supplement: jitc-2021-002508supp002.pdf [file jitc-2021-002508supp002.pdf]

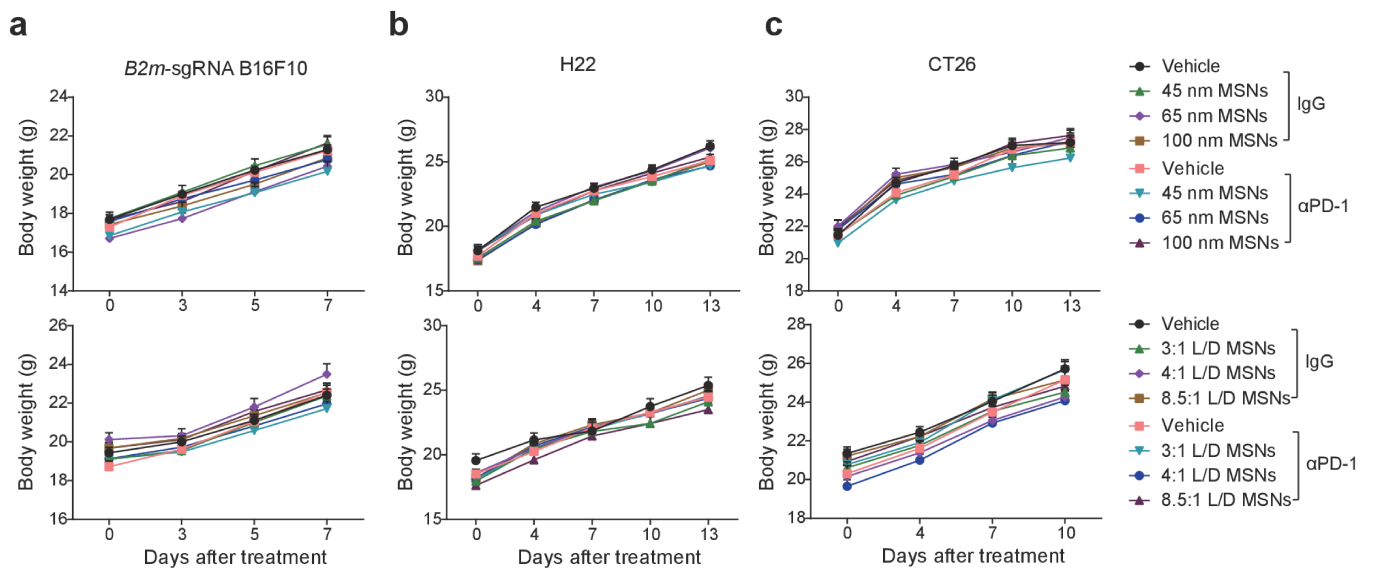

Supplement: jitc-2021-002508supp003.pdf [file jitc-2021-002508supp003.pdf]

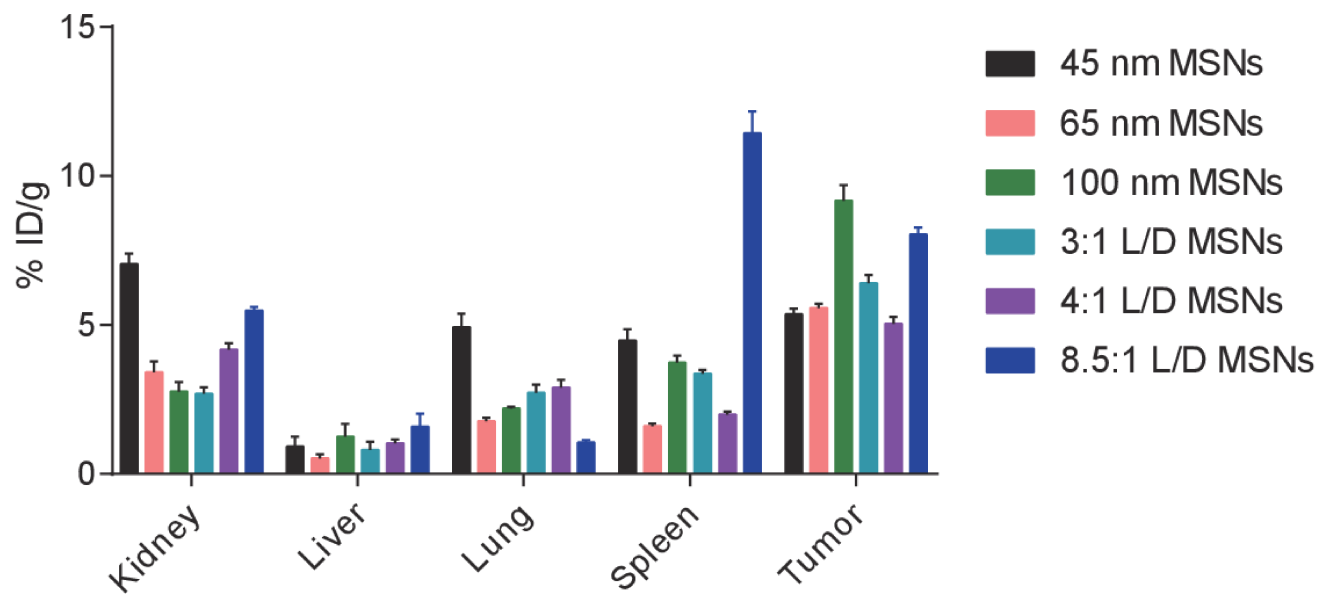

Supplement: jitc-2021-002508supp004.pdf [file jitc-2021-002508supp004.pdf]

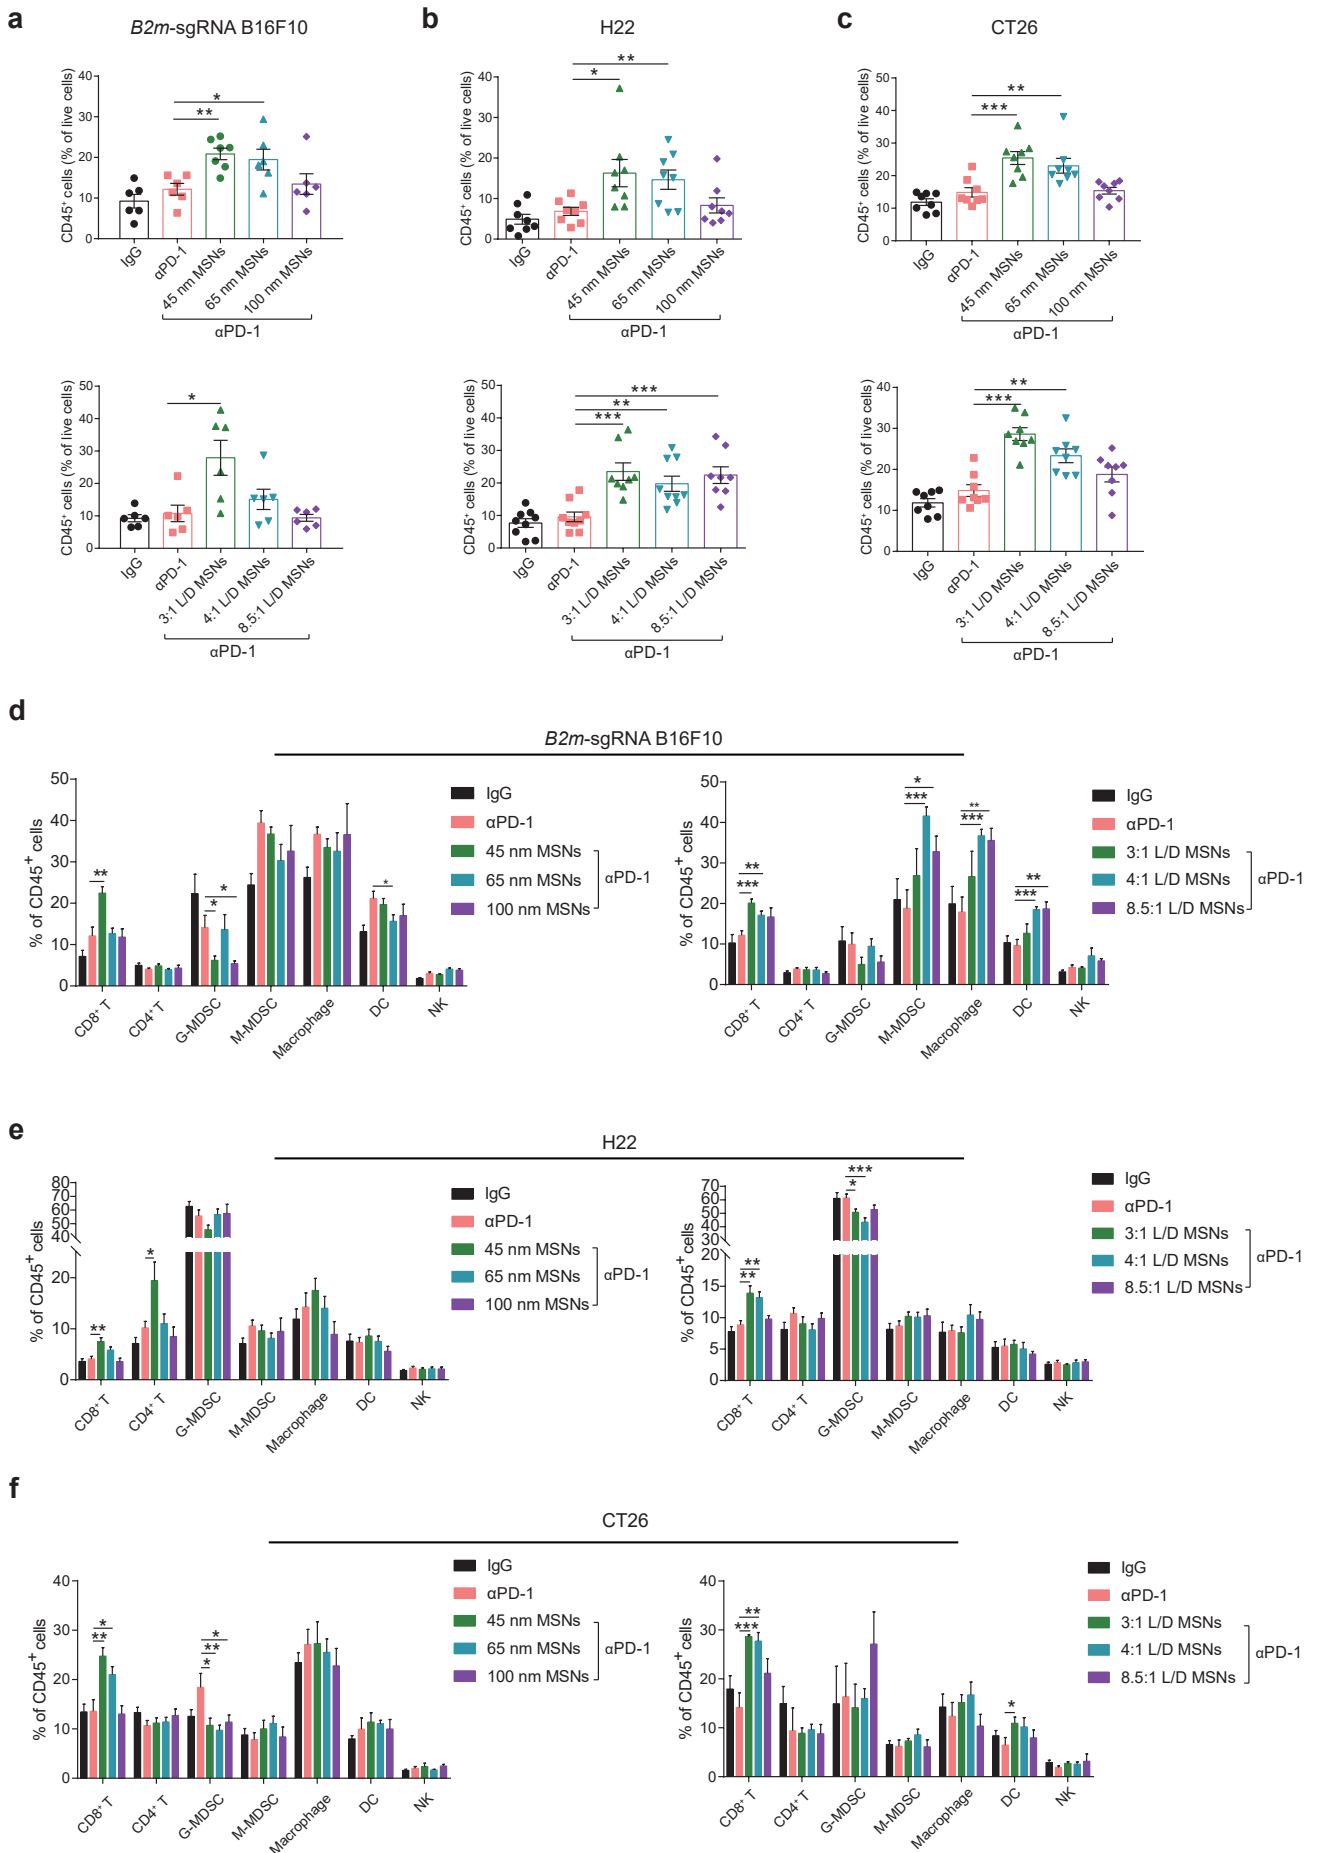

Supplement: jitc-2021-002508supp005.pdf [file jitc-2021-002508supp005.pdf]

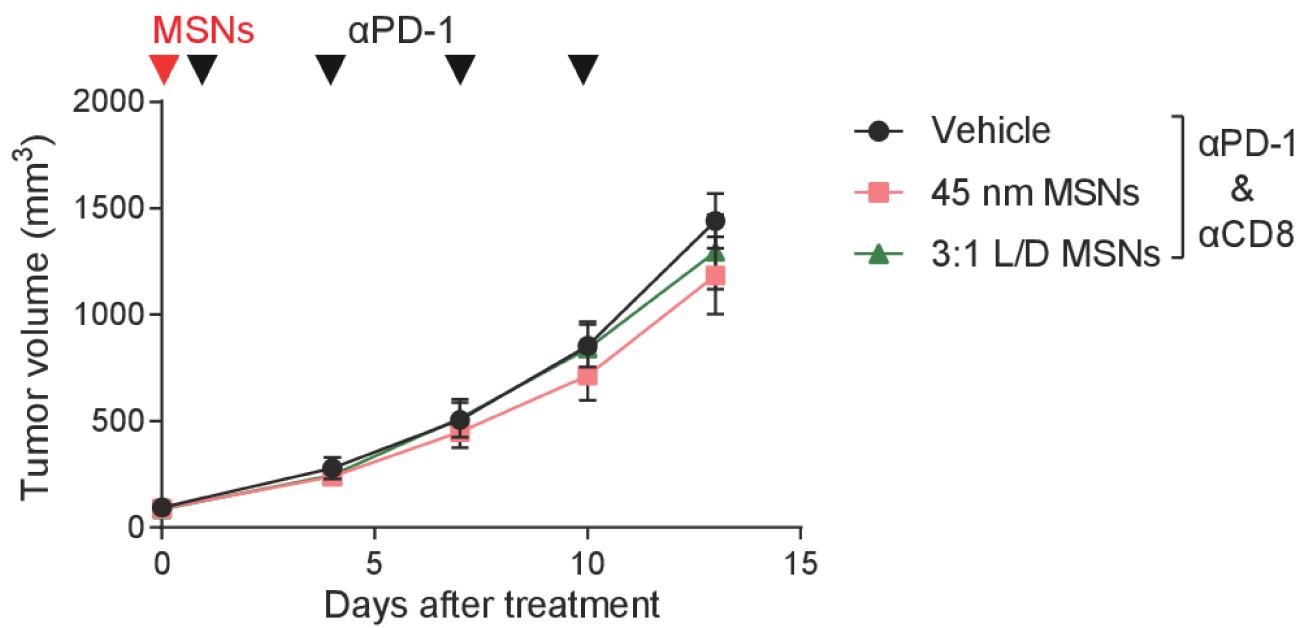

Supplement: jitc-2021-002508supp006.pdf [file jitc-2021-002508supp006.pdf]

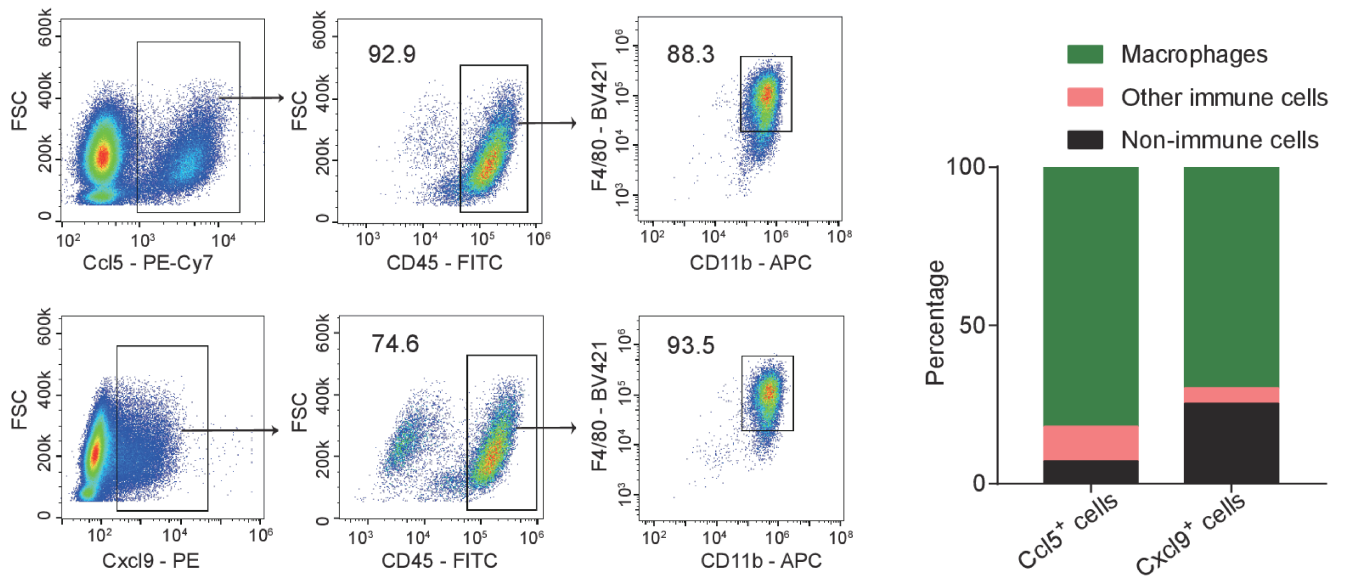

Supplement: jitc-2021-002508supp007.pdf [file jitc-2021-002508supp007.pdf]

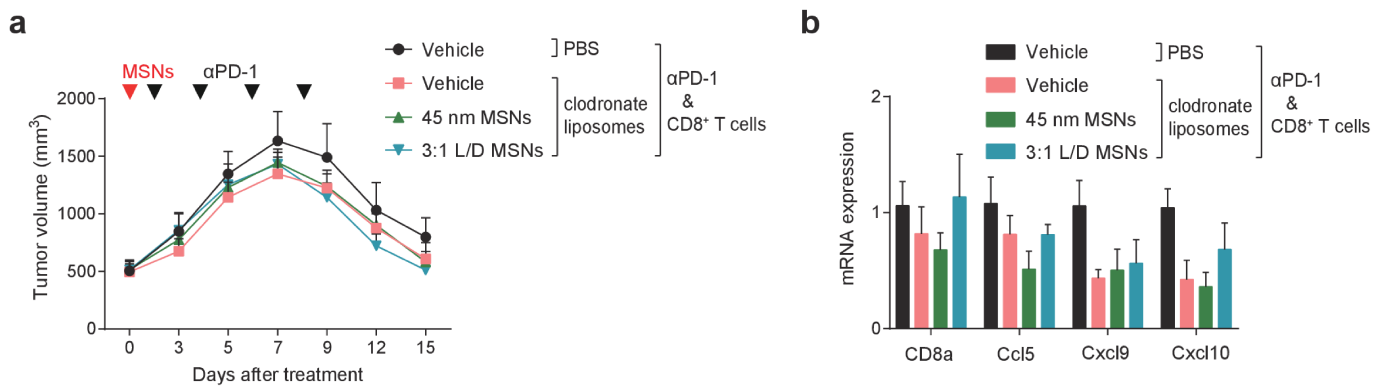

Supplement: jitc-2021-002508supp008.pdf [file jitc-2021-002508supp008.pdf]

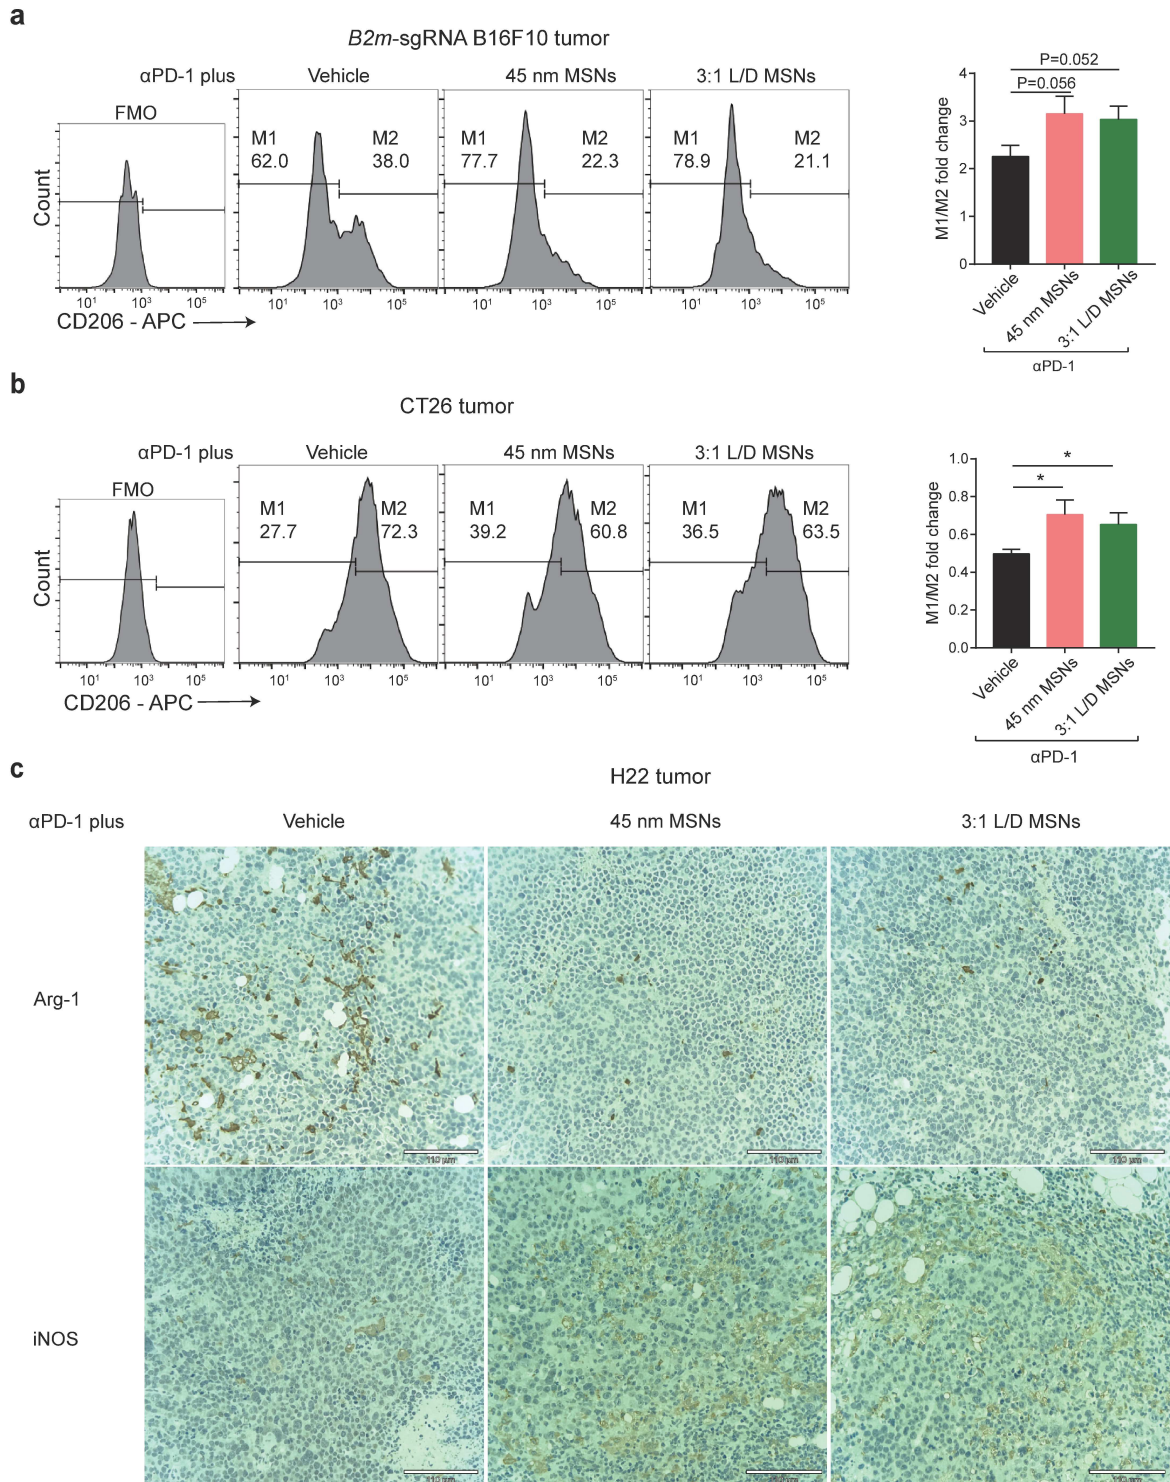

Supplement: jitc-2021-002508supp009.pdf [file jitc-2021-002508supp009.pdf]

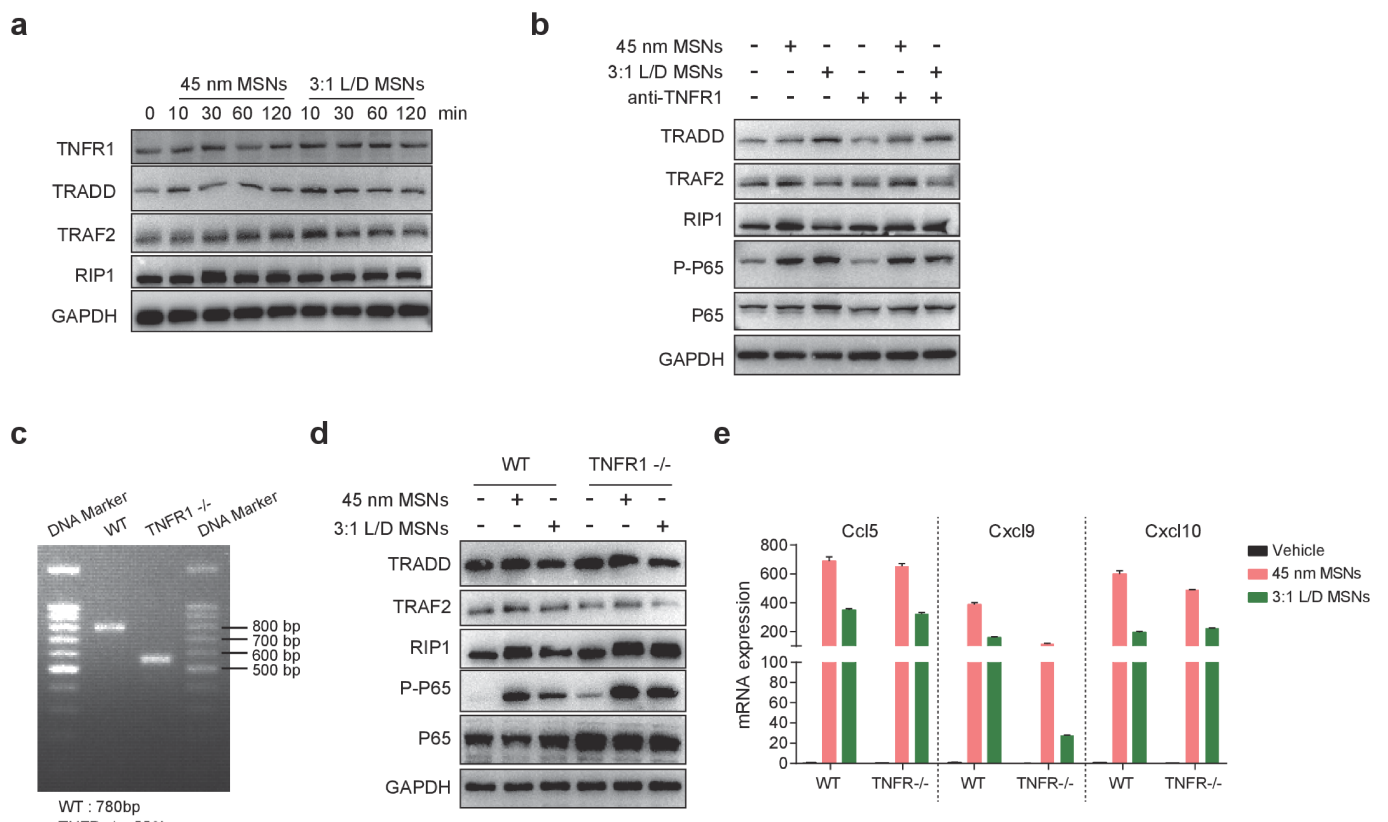

Supplement: jitc-2021-002508supp010.pdf [file jitc-2021-002508supp010.pdf]
